1                   **Phenotypic and metabolic plasticity shapes life-history**  
2                   **strategies under combinations of abiotic stresses**

3  
4   **Lidor Shaar-Moshe<sup>1</sup>, Ruchama Hayouka<sup>1</sup>, Ute Roessner<sup>2</sup> and Zvi Peleg<sup>1\*</sup>**

5  
6   <sup>1</sup>. The Robert H. Smith Institute of Plant Sciences and Genetics in Agriculture, The Hebrew  
7   University of Jerusalem, Rehovot 7610001, Israel.

8   <sup>2</sup>. School of BioSciences, The University of Melbourne, Melbourne 3010, Australia.

9  
10  
11   **Corresponding author:** Zvi Peleg, The Robert H. Smith Institute of Plant Sciences and  
12   Genetics in Agriculture, The Hebrew University of Jerusalem. P.O. Box 12, Rehovot 7610001,  
13   Israel.

14   Tel: +972-8-9489638; Email: [zvi.peleg@mail.huji.ac.il](mailto:zvi.peleg@mail.huji.ac.il)

15  
16  
17   **Running title:** Unique acclimations to abiotic-stress combinations

18

1 **Abstract**

2 Plants developed various reversible and non-reversible acclimation mechanisms to cope with the  
3 multifaceted nature of abiotic stress combinations. We hypothesized that in order to endure these  
4 stress combinations, plants elicit distinctive acclimation strategies through specific trade-offs  
5 between reproduction and defense. To investigate *Brachypodium distachyon* acclimation  
6 strategies to combinations of salinity, drought and heat, we applied a system biology approach,  
7 integrating physiological, metabolic and transcriptional analyses. We analyzed the trade-offs  
8 among functional and performance traits, and their effects on plant fitness. A combination of  
9 drought and heat resulted in escape strategy, while under a combination of salinity and heat,  
10 plants exhibited avoidance strategy. On the other hand, under combinations of salinity and  
11 drought, with or without heat stress, plant fitness (i.e. germination rate of subsequent generation)  
12 was severely impaired. These results indicate that under combined stresses, plants' life-history  
13 strategies were shaped by the limits of phenotypic and metabolic plasticity and the trade-offs  
14 between traits, thereby giving raise to distinct acclimations. Our findings provide a mechanistic  
15 understanding of plant acclimations to combinations of abiotic stresses and shed light on the  
16 different life-history strategies that can contribute to grass fitness and possibly to their dispersion  
17 under changing environments.

18

19

20 **Key words:** abiotic-stress combinations, *Brachypodium*, fitness, life-history strategy,  
21 metabolomics, physiology, trade-off, transcriptomics.

22

## 1 **Introduction**

2 Phenotypic plasticity, the ability of a given genotype to express different phenotypes under  
3 alternative environmental conditions (Pigliucci, 2001), is a fundamental feature of plants,  
4 enabling them to optimize their fitness under changing and uncertain environments (Matesanz et  
5 al., 2010). The capacity of an organism to express plasticity in a given trait is mediated at the  
6 molecular level (Schlichting and Smith, 2002) and involves various reversible and non-reversible  
7 developmental, anatomical, morphological and physiological modifications (Nilson and  
8 Assmann, 2010). In contrast to genetic alterations that occur across several generations,  
9 phenotypic plasticity accounts for the plant responses to environmental changes within the life  
10 span of an individual plant (Bradshaw, 1965). It is assumed that the ability of phenotypic  
11 plasticity to alleviate short-term environmental changes could also be beneficial upon the long-  
12 term effects of climatic changes (Jump and Peñuelas, 2005).

13 Plant life-history, which aims at understanding and predicting the existence of plants with  
14 different traits and strategies, is predicted to change under environmental stresses through  
15 alterations in plant growth, reproduction and survival, the three main life-history traits (Grime,  
16 1977). These performance traits, which directly contributing to plant fitness, can be modulated  
17 by morphological, physiological or phenological traits (i.e. functional traits) (Violle et al., 2007).  
18 Plant life-history strategies rely on trade-offs in resource partitioning between growth,  
19 reproduction and defense, due to resource limitations, and/or environmental stresses (Bazzaz et  
20 al., 1987). These constrains limit the capacity of the plants to acquire net carbon and alter the  
21 energy balance and allocation of assimilates from growth and reproduction into defense (Sultan,  
22 2000). Variations in life-history strategies usually involve cross-species comparisons (e.g.  
23 (Salguero-Gomez et al., 2016). However, owing to their phenotypic plasticity, plants from the  
24 same genotype growing in different environments, can differ in the trade-offs of resource  
25 allocation, thus, exhibiting different life-history strategies (De Deyn, 2017). One of the  
26 challenges of plant biology is to identify these genetic trade-offs and through a mechanistic  
27 understanding manipulate them for crop improvement (Des Marais and Juenger, 2016).

28 Environmental stresses, such as soil salinization, drought episodes and heat waves, are  
29 among the main factors limiting plant performance and affecting their ecological fitness. At the  
30 Mediterranean-like conditions, these stresses usually occur simultaneously, effecting both natural  
31 and agricultural systems (Vautard et al., 2007; Maggio et al., 2011). Moreover, based on climate

1 change models, plants are projected to encounter a greater range and number of abiotic stress  
2 combinations in the near future. To cope with such environmental constrains, plants have  
3 evolved a variety of acclimation mechanisms. These mechanisms can be encapsulated to two  
4 main strategies: *escape* (e.g. rapid completion of the plant life cycle or deeper rooting), and  
5 *resistance*, which is sub-divided to *avoidance* (altering or halting the effect of the stress through  
6 mainly morphological and/or anatomical changes), and *tolerance* (maintaining normal functions  
7 despite the presence of the stress through molecular mechanisms) (Levitt, 1972; Mickelbart et  
8 al., 2015). Plants can combine acclimation mechanisms from different strategies, thus eliciting an  
9 environmentally induced phenotypic variation.

10 *Brachypodium distachyon* (L.) Beauv. is a model system for Pooid cereal and forage  
11 species that has been used to study environmental stress responses such as: drought, extreme  
12 temperature, salinity and nutrient availability (reviewed by Scholthof et al., 2018). However,  
13 except for a few studies (e.g. Barhoumi et al., 2010; Des Marais et al., 2017; Shaar-Moshe et al.,  
14 2017), most of these experiments involved single stresses at early vegetative stages. In order to  
15 study *B. distachyon* acclimation strategies to environmental stresses, information on life-history  
16 and phenological data is required since they determine the coordination of environmental  
17 conditions with developmental transitions, the occurrence of the stress and the expected  
18 acclimation strategy (Des Marais and Juenger, 2016).

19 Recently we have shown a unique transcriptional signature among genes that were  
20 differentially expressed only under combinations of stresses. This transcriptional pattern was  
21 enriched with antagonistic responses, suggesting alterations in the mode of action under different  
22 combinations of stresses (Shaar-Moshe et al., 2017). Here we used a system biology approach to  
23 test the hypothesis that plants elicit a unique acclimation strategy, with distinct trade-offs in life-  
24 history traits of growth, reproduction and defense, under each combination. The objectives of  
25 this study were to *i*) characterize the effects of combined stresses on plant fitness and *ii*)  
26 determine the trade-offs among functional and performance traits. Our results shed light on life-  
27 history strategies, and the capacity of phenotypic and metabolic plasticity, which can facilitate  
28 plant acclimations to the projected changing environments.

29

## 1 **Material and methods**

### 2 ***Plant material and growth conditions***

3 *Brachypodium distachyon* accession Bd21-3 plants were grown as previously described (Shaar-  
4 Moshe et al., 2017). Briefly, following 48h at 4°C to synchronize germination and 5d at 15°C to  
5 establish germination, uniform seedlings were transplanted into pre-weighted 1L pots and  
6 transfer to a Phytotron (22°C day/16°C night, 10h light/14h dark). The dry and fully irrigated  
7 weight of the pots were used to calculate soil water content. Plants were irrigated to runoff with  
8 fresh water three times a week, and fertilized with 1g L<sup>-1</sup> N:P:K (20% nitrogen, 20% phosphorus  
9 and 20% potassium) + micronutrients, eight weeks after germination. Ten weeks after  
10 germination, plants transferred to a long day regime (15h light/9h dark).

11 Each plant was subjected to one of the following five treatments in a split-plot factorial  
12 (treatment) complete random design: *Control* (*C*), plants were grown at 22°C day/16°C night  
13 throughout the experiment. Combination of salinity and heat (*S&H*), plants were exposed  
14 progressively to salinity, starting at five-leaf stage, by two irrigations of 20mM NaCl, followed  
15 by five irrigations with 50 and then 80mM NaCl. Target concentration of 100mM NaCl, which  
16 was achieved within four weeks, was kept throughout the experiment. Runoff electric  
17 conductivity was monitored weekly. At anthesis, plants were transferred on 20:00 pm, to a pre-  
18 heated greenhouse at the Phytotron (34°C day/28°C night) for four days. Combination of drought  
19 and heat (*D&H*), plants were gradually exposed to water stress, starting at booting stage (BBCH  
20 scale 45; Hong et al., 2011, approximately 12 weeks after germination), by withholding  
21 irrigation. Each pot was weighted every second day and relative soil water content was  
22 maintained at 40% for 17 days. At anthesis, plants were subjected to heat stress as described  
23 above. Combinations of Salinity and drought (*S&D*) and (*S&D&H*), salinity and drought stresses  
24 were applied gradually at five-leaf and booting stage, respectively, as described above. Heat  
25 stress was applied at anthesis, as described above. Under the two combinations, plants were  
26 irrigated with fresh water once drought stress was imposed (Supplementary Fig. S1).

27

### 28 ***Performance traits and plant fitness***

29 Plants were documented and measured for shoot dry weight (DW) at three developmental stages  
30 during the reproductive stage: 4, 12 and 17 days after anthesis (DAA). At the end of the growing  
31 season, when plants from all treatments senesced, spikes and shoots, from each plant, were

1 separately harvested ( $n=5$ ) and oven-dried ( $75^{\circ}\text{C}$  for 96h). Samples were weighted to determine  
2 shoot DW. The reproductive samples were threshed, and grain were weighted and counted to  
3 obtain 100-grain weight. The ratio between spike DW and whole shoot DW was used to  
4 calculate the reproductive allocation. Grain parameters were analyzed using GrainScan software  
5 (Whan et al., 2014). Germination assay was performed using the “cigar roll” method (Watt et al.,  
6 2013). Twenty uniform grains, which developed on plants subjected to control or stress  
7 combination treatments ( $n=3$ ), were placed on a moist germination paper ( $25\times 38\text{cm}$ ; Anchor  
8 Paper Co., St. Paul, MN, USA), three cm from the top of the sheet, with the embryo facing  
9 down. The paper was covered with additional sheet of moist germination paper and then rolled  
10 tightly to a final diameter of  $\sim 4$  cm. The base of the rolls was dipped in a tray of tap water and  
11 stored in darkness for 48h at  $4^{\circ}\text{C}$ , followed by 6d at  $15^{\circ}\text{C}$  for establishment of germination. The  
12 number of grains with the primary seminal root was recorded to determine grain viability.

13

#### 14 ***Functional traits***

15 Measurements of chlorophyll fluorescence and content were conducted in a complete random  
16 design at three developmental stages during the reproductive stage: 4, 12 and 17 DAA, on the  
17 mid portion of the adaxial side of the third leaf. Chlorophyll fluorescence was measured using a  
18 portable chlorophyll fluorometer MINI-PAM-II (Walz GmbH, Effeltrich, Germany). Dark-  
19 adapted  $F_v/F_m$  was determined following 40 min of whole plant dark-adaptation ( $n=4$ ).  $F_v/F_m$   
20 values that represent maximal photochemical efficiency of photosystem II were automatically  
21 calculated as  $(F_m - F_0)/F_m$  by the WinControl-3 software. Chlorophyll content (SPAD value;  
22  $n=4$ ) was assessed by the SPAD-502 chlorophyll meter (Minolta Camera Co., Japan). Each  
23 SPAD value is the mean of five technical replicates measured from five different leaves, per  
24 plant. Carotenoid content and plant senescence were estimated using non-destructive reflectance  
25 measurements, on the mid portion of the adaxial side of the third leaf, by the CI-710 Miniature  
26 Leaf Spectrometer (CID Bio-Science, USA), at 4 DAA. Integration time was 800 milliseconds,  
27 boxcar width was 10 points and each value represents an average of four scans. The following  
28 reflectance indices were used for carotenoid fluorescence:  $\text{CRI}_{550} = (1 / W_{510}) - (1 / W_{550})$   
29 (Gitelson et al., 2002) and plant senescence:  $\text{PSRI} = (W_{680} - W_{500}) / W_{750}$  (Merzlyak et al.,  
30 1999), where W represents the wavelengths used to calculate the indices. Measurements of  
31 relative water content (RWC) and osmotic adjustment (OA) were performed on the third leaves

1 at mid-day ( $n=5$ ), as described previously (Shaar-Moshe et al., 2015). Ion concentrations (i.e.  $\text{Cl}^-$ ,  
2  $\text{Na}^+$  and  $\text{K}^+$ ), under control and stress treatments, were evaluated based on (Yermiyahu et al.,  
3 2017). Oven-dried leaf samples ( $n=6$ ) ( $75^\circ\text{C}$  for 96h) were ground to a fine powder. One hundred  
4 mg from each sample was added to 10 mL double-distilled water (DDW), followed by an  
5 overnight incubation. Sodium ( $\text{Na}^+$ ) and potassium ( $\text{K}^+$ ) concentrations were analyzed by atomic  
6 absorption (PerkinElmer Precisely Analyst 200) and chloride ( $\text{Cl}^-$ ) concentrations were  
7 quantified with chloridometer (MK II Chloride Analyzer 926, Sherwood Scientific Ltd.,  
8 Cambridge, UK).

9

### 10 ***Transcriptional data and analysis***

11 Extraction of RNA from flag and second leaf samples and preparation of cDNA libraries and  
12 their sequencing were previously described in Shaar-Moshe et al. (2017). Briefly, at 4 DAA leaf  
13 samples, were collected, frozen in liquid nitrogen and total RNA was extracted using Plant/Fungi  
14 Total RNA Purification Kit (Norgen Biotek Corp., Canada). Three biological replicates from  
15 each condition, with the highest values of RNA integrity, chosen for RNA sequencing. Twenty-  
16 four cDNA libraries were subjected to single-end multiplex sequencing (50bp) on the Illumina  
17 HiSeq2500 sequencer (Technion Genome Center, Haifa, Israel), using the TruSeq RNA sample  
18 preparation kit ver.2 (Illumina, San Diego, USA), according to manufacturer's standard  
19 protocols. Data processing, which included barcode removal, filtering of low quality reads and  
20 alignment of the reads to the *B. distachyon* reference genome (Bd21-3 v.1), as well as analysis of  
21 differentially expressed genes, with DESeq2 package (Love et al., 2014), and their functional  
22 annotation, based on MapMan tool (Thimm et al., 2004), were obtained from (Shaar-Moshe et  
23 al., 2017). Files of the raw mRNA-seq are available at the short-read archive of the National  
24 Center for Biotechnology Information (<https://www.ncbi.nlm.nih.gov/sra>) under accession  
25 number PRJNA360513.

26

### 27 ***Determination of starch content***

28 Starch content was determined as described previously (Naschitz et al., 2010), with minor  
29 modifications. Briefly, 50mg of lyophilized leaf samples ( $n=5$ ) that were collected at 5 DAA at  
30 18:00 pm were ground with liquid nitrogen and rinsed three times with 80% ethanol to remove  
31 soluble sugars. The pellet was fluidized with DDW and starch was hydrolyzed with

1 amyloglucosidase (Sigma), in 15mM sodium acetate pH 4.5, overnight at 55°C. Subsequently,  
2 soluble sugar content was determined spectrophotometrically with Epoch plate reader, with  
3 absorbance at 340nm, using Glucose (HK) assay kit (Sigma).

#### 4 5 ***Metabolite extraction***

6 Flag and second leaf ( $n=5$ ) were harvested at four DAA, immediately frozen in liquid nitrogen  
7 and stored at -80°C until lyophilization. Sample were weighted and transferred to cryo-mill tubes  
8 (Precellys 24, Bertin Technologies). Methanol (MeOH, 500  $\mu$ L) containing the internal standards  
9 [D-Sorbitol- $^{13}\text{C}_6$  (0.02 mg/mL) and L-Valine- $^{13}\text{C}_5,^{15}\text{N}$  (0.02mg/mL), Sigma Aldrich (Australia)]  
10 was added to the samples, followed by vortex and homogenization (3 $\times$ 45s at 6400 rpm) at -10°C  
11 using a Cryomill (Precellys 24, Bertin Technologies). The samples were then extracted at 70°C  
12 in a thermomixer at 850 rpm, and centrifuged for 5 min at 4°C, at 13,000 rpm. The MeOH  
13 supernatant was collected into new reaction tubes and 500 $\mu$ L water (Milli Q grade) was added to  
14 the tubes containing the sample pellet, followed by vortex-mixed for 30s, and centrifuged at  
15 13,000 rpm for 10 min at 4°C. The supernatants were combined and 100 $\mu$ L were dried *in vacuo*  
16 for gas chromatography–mass spectrometry (GC–MS) untargeted analysis.

#### 17 18 ***Derivatization for GC–MS analysis***

19 Derivatization for GC–MS analysis was performed as described in Dias *et al.* (2015). After  
20 completion of derivatization, samples were set for one hour and then 1 $\mu$ L was injected onto the  
21 GC column using a hot needle technique. Splitless and split (1:20) injections were performed for  
22 each sample.

#### 23 24 ***Untargeted GC–MS and statistical analysis***

25 Untargeted GC–MS analysis and data analysis were carried out as described in (Hill et al., 2015).  
26 The metabolite data were analyzed with the open-source software, MetaboAnalyst 3.0 (Xia and  
27 Wishart, 2016). Interquartile range was used for data filtering, followed by log transformation for  
28 data normalization. The metabolites are presented as fold change (FC) values relative to control  
29 conditions and a 10% false discovery rate correction for multiple comparisons (Benjamini and  
30 Hochberg, 1995), was used to detect significant alterations in metabolite accumulation.

31



## 1 *Statistical and data analyses*

2 Measurements of functional and performances traits, as well as correlation between gene  
3 expression data and functional traits or metabolites were analyzed statistically using JMP<sup>®</sup> pro  
4 13 statistical package (SAS Institute, Cary, NC, USA). All traits were examined for  
5 homoscedasticity among treatments. Differences between control and stress treatments, were  
6 detected using one-way analysis of variance (ANOVA), followed by Dunnet's test at  $P \leq 0.05$ . In  
7 the absence of homoscedasticity among treatments, nonparametric comparisons with Steel  
8 method ( $P \leq 0.05$ ) were used to detect differences between control and stress conditions.  
9 Differences between two treatments were detected using Student's *t*-test at  $P \leq 0.05$ . Principle  
10 component analysis (PCA), based on  $\log_2$  FC values of genes assigned to functional categories  
11 (e.g. carotenoid synthesis and starch metabolism), was used to identify the first principal  
12 component (PC1, eigenvalues  $>1$ ) that accounted for the maximal variation among gene  
13 expression. Associations between PC1 and the FC values of the corresponding functional traits  
14 or metabolites were studied using Pearson correlation analysis at  $P \leq 0.1$ . In the lack of liner  
15 relationship, nonparametric correlation with Spearman's correlation was used. Correlations  
16 between traits or between metabolites were studied using Pearson correlation analysis at  $P \leq 0.05$ .  
17 PCA was used to evaluate the association between osmolytes (i.e. 11 metabolites and 3 ions) and  
18 OA and RWC. PCA is presented as a biplot of the two major PCs (Eigenvalues  $>1$ ). Line and  
19 box plots were generated by ggplot function in ggplot2 package.

20

21

## 22 **Results**

### 23 *Under S&H plants maintained their reproductive allocation, while under S&D and S&D&H* 24 *their fitness was severely impaired*

25 All stress combinations resulted in detrimental phenotypic effects, which included a reduction in  
26 shoot height and chlorophyll content (SPAD units; Fig. 1A). However, depending on the  
27 combination of the stresses, a differential acclimation response, which varied in magnitude and  
28 timing, was elicited by the plants. For example, under the combination of drought and heat  
29 (D&H), chlorophyll content decreased by 20 and 82%, at 4 and 12 DAA (i.e. at grain filling),  
30 respectively, compared with control. Yet, under the other stress combinations, significant  
31 reductions in chlorophyll content were detected only at 17 DAA (during grain maturation period)

1 (Fig. 1B, Supplementary Table S1). Genes involved in chlorophyll degradation were up-  
2 regulation at four DAA, among all combined stresses. A predominant increase was found under  
3 D&H that resulted in the highest expression of *chlorophyll b reductase* (BRADI1G13416), which  
4 catalyzes the first step in the conversion of chlorophyll b to a, and *pheophorbide a oxygenase*  
5 (BRADI3G53860 and BRADI1G75270), which produces red chlorophyll catabolite from  
6 pheophorbide a (Barry, 2009) (Supplementary Table S2).

7 To assess the effects of the combined stresses on plant fitness and its performance traits,  
8 we measured shoot dry weight (DW) at three reproductive stages; 4, 12 and 42 DAA (i.e. plant  
9 senescence). In addition, we measured spike DW at 42 DAA and estimated the proportion of  
10 spike DW per shoot DW, as a surrogate for reproductive allocation. Overall, the plants  
11 accumulated significantly less shoot DW under the combined stresses, compared with control  
12 conditions. Under D&H and the combination of salinity and heat (S&H), plants accumulated on  
13 average 34% more DW than under the combination of salinity and drought (S&D) and salinity,  
14 drought and heat (S&D&H), across the three developmental stages. During the reproductive  
15 stages the vegetative growth of cereals is ceased, thus, any accumulation of shoot DW is  
16 attributed to an increase in the weight of reproductive tissues and subsequently to grain  
17 production. Under control and S&H, the plants accumulated on average ~55% of their weight  
18 from 4 DAA until senescence (i.e. 42 DAA) and showed a comparable level of reproductive  
19 allocation. However, the other stress combinations showed a milder DW accumulation of only  
20 ~33% and their reproductive allocation was significantly decreased, especially under S&D&H  
21 (Fig. 1C, D). To assess the causes for the different spike DW and reproduction allocation among  
22 the combined stresses, we examined several yield parameters. Total grain weight and number  
23 followed a similar gradual decrease as shoot DW. Under S&H, plants showed limited grain losses,  
24 while under S&D&H plants exhibited severe impairments (Fig. 1E, F). This pattern was not  
25 observed upon examination of 100-grain weight, which showed significant decreases under S&H  
26 and S&D&H, compared with control (Fig. 1G). As shoot DW accumulated to similar values under  
27 S&H and D&H, the difference in the reproductive allocation between the two combinations, can  
28 be attributed to higher values of total grain weight and number, under S&H, which compensated  
29 for the mild decrease in 100-grain weight (Fig. 1C-G). Examination of grain viability, of grains  
30 that developed on plants subjected to combinations of stresses, revealed a severe impairment in  
31 germination rate only under S&D and S&D&H, compared with control (Supplementary Fig. S2).

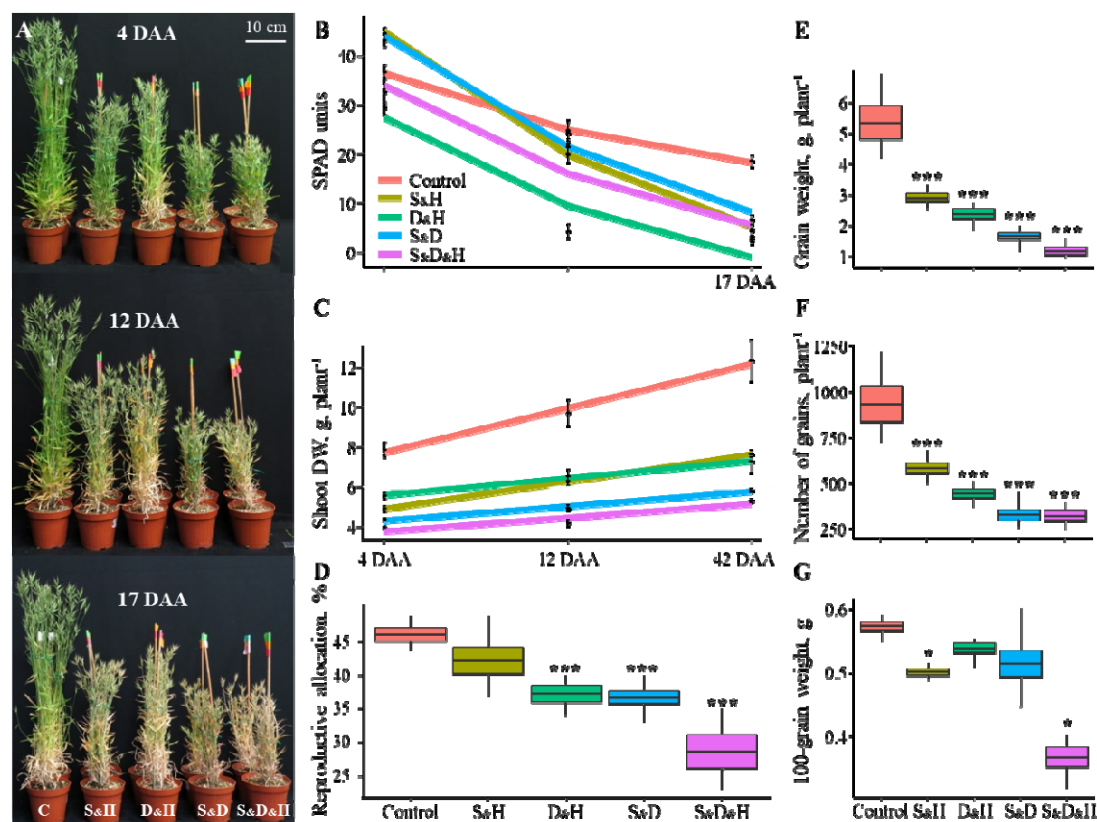

1  
2 **Fig. 1.** Performance traits and fitness of *Brachypodium distachyon* plants grown under control (C) and combinations of stresses:  
3 salinity and heat (S&H), drought and heat (D&H), salinity and drought (S&D), salinity, drought and heat (S&D&H). (A) Plants  
4 grown under control conditions and four combinations of stresses at three developmental stages during the reproductive stage: 4,  
5 12 and 17 days after anthesis (DAA). (B) Chlorophyll content at 4, 12, and 17 DAA, under control and combinations of stresses.  
6 (C) Accumulation pattern of shoot dry weight (DW) at 4, 12, and 42 DAA. Values and significance levels are indicated in  
7 Supplementary Table S1. (D) Box plots of reproductive allocation (i.e. the ratio between spike and shoot DW), (E) grain weight,  
8 (F) number of grains per plant, and (G) 100-grain weight. \* and \*\*\* indicate significant differences between control and stress  
9 treatments at  $P \leq 0.05$  and 0.001, respectively, as determined by Dunnett's test. Values are mean ( $n=4$ ) $\pm$ SE.

### 12 *D&H* resulted in a rapid reduction of chlorophyll fluorescence

13 To investigate the effects of the combined stresses on the photosynthetic apparatus and its  
14 associated pigments, we measured the maximal photochemical efficiency of photosystem II  
15 (PSII) ( $F_v/F_m$ ) at the three developmental stages during the reproductive stage. Under both  
16 S&D&H and D&H,  $F_v/F_m$  declined by ~12 and 92%, at 12 and 17 DAA, respectively, compared  
17 with control (Fig. 2A and Supplementary Table S1). Physiological responses and acclimations  
18 are the consequences of several level of regulations, including orchestrated transcriptional  
19 changes. To evaluate the contribution of transcriptional modifications to plant acclimation under  
20 combined stresses and identify potential pathways that may directly regulate plant phenotypes,  
21 we examined the association between physiological traits and the transcriptional patterns of the

1 underlying genes. This analysis revealed a high correlation ( $r=0.9$ ,  $P=0.1$ ) between the  
2 physiological changes of PSII efficiency and expression patterns of genes that are involved in  
3 light harvesting complex and polypeptide subunits of PSII (Fig. 2A, B and Supplementary Table  
4 S2). Genes that showed a higher expression level under S&H and S&D include *PSB27-H1*  
5 (BRADI1G63300), which is required for the formation and stability of PSII-LHCII  
6 supercomplexes in *Arabidopsis*, and *PSB27-H2/LPA19* (BRADI1G08720), which functions in  
7 C-terminal processing of D1. Among the genes that displayed a lower expression level under  
8 S&D&H and D&H is *PPL1* (BRADI1G77047) that is required for efficient repair of  
9 photodamaged PSII (Lu, 2016).

10

### 11 *S&H and S&D differentially affect carotenoid content and leaf senescence*

12 Carotenoids have a structural role in the assembly of the photosynthetic apparatus, and the  
13 retention of carotenoids, in the progress of chlorophyll breakdown during senescence, has been  
14 suggested as a mechanism of photoprotection (Nisar et al., 2015). To assess the content of  
15 carotenoid in the leaves, we used the non-destructive carotenoid reflectance index 1 (CRI1)  
16 (Gitelson et al., 2002). Under D&H and S&D&H, plants exhibited low values of CRI1, whereas  
17 under S&H and S&D, CRI1 values were comparable to control (Fig. 2C). In accordance, the  
18 expression pattern of genes that are involved in carotenoid metabolism exhibited a high and  
19 positive association with carotenoid content under the combined stresses (Fig. 2D and  
20 Supplementary Table S2).

21 Plant senescence reflectance index (PSRI), which estimates the proportion between  
22 chlorophyll and carotenoids (Merzlyak et al., 1999), was used to quantitatively evaluate leaf  
23 senescence. All stress combinations, except for S&D, showed higher values of PSRI, compared  
24 with control, indicating stress induced-senescence (Fig. 2E). This pattern was also reflected at  
25 the transcriptional level by a strong association between PSRI and senescence associated genes  
26 (SAG). In addition, a high correlation ( $r=0.97$ ,  $P=0.03$ ) was detected between PSRI and genes  
27 involved in chloroplast nucleoid metabolism and maintenance (Supplementary Table S2), a  
28 pathway that was enriched among genes uniquely expressed only under stress combinations  
29 (Shaar-Moshe et al., 2017). The different PSRI values that were detected between S&H and S&D  
30 might be attributed to a higher carotenoid content under S&D, as chlorophyll contents were  
31 comparable under these stress combinations (Figs. 1B, 2C). Consistently, mRNA levels of

1 *phytoene synthase* (*PSY*, BRADI4G37520), a rate-limiting enzyme, which catalyzes the first  
 2 committed step in carotenogenesis (Hirschberg, 2001), were up-regulated only under S&D  
 3 (Supplementary Table S2).

4

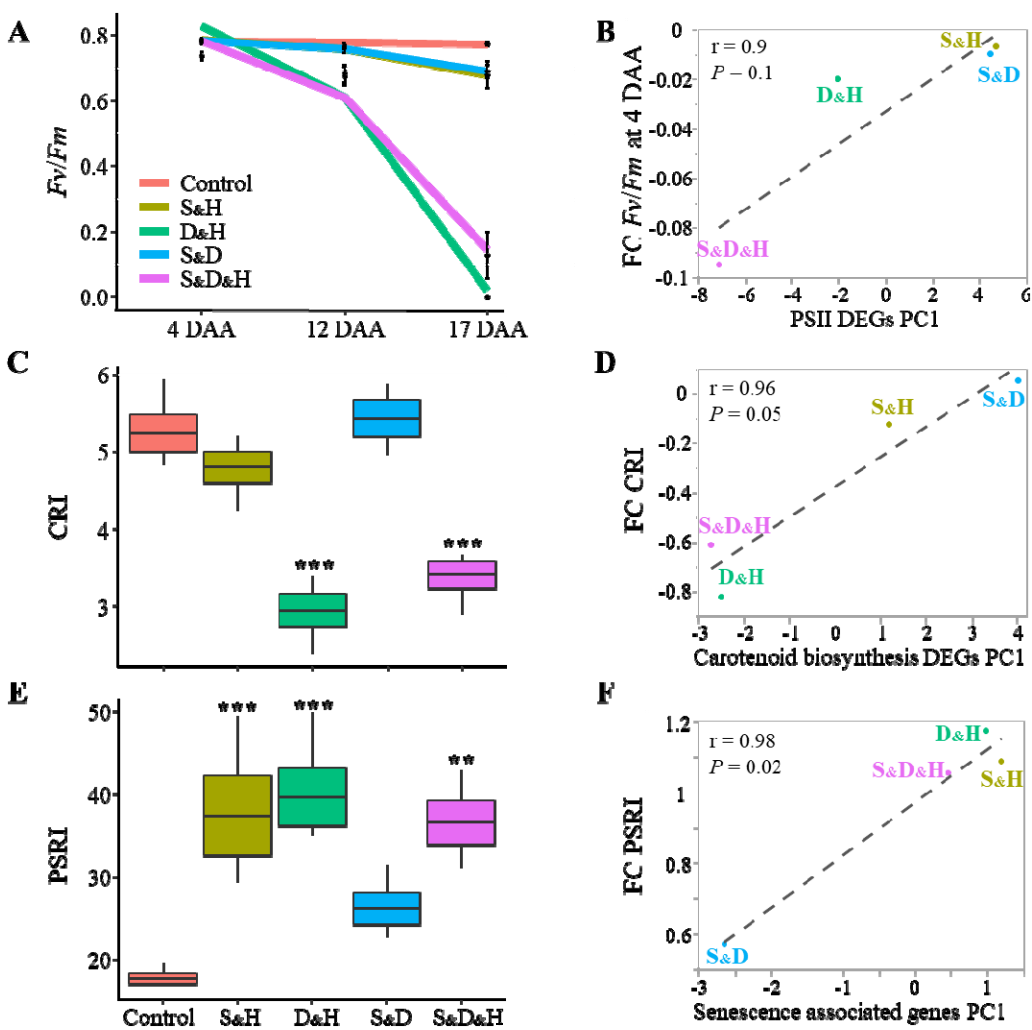

5

6 **Fig. 2.** Differential effects of combined stresses on photosynthetic apparatus, its associated pigments and the progression of  
 7 senescence at the physiological and transcriptional levels. (A) Maximal photochemical efficiency of photosystem II ( $F_v/F_m$ ), at  
 8 4, 12, and 17 days after anthesis (DAA), under control and combinations of stresses. (B) Correlation between first principle  
 9 component (PC1) of expression pattern of genes related to photosystem II (PSII) and fold change (FC) values of  $F_v/F_m$  at 4  
 10 DAA. (C) Box plots of carotenoid reflectance index (CRI) that is calculated as  $1/W_{510} - 1/W_{550}$ . W represents the wavelengths  
 11 used to calculate the reflectance index. (D) Correlation between PC1 of expression pattern of genes involved in carotenoid  
 12 synthesis and FC values of carotenoid content. (E) Box plots of plant senescence reflectance index (PSRI) that is calculated as  
 13  $[(W_{680}-W_{500}) / W_{750}] \times 1000$ . (F) Correlation between PC1 of expression pattern of senescence associated genes (SAGs) and  
 14 PSRI. \*\* and \*\*\* indicate significant differences between control and stress treatments at  $P < 0.01$  and  $0.001$ , respectively, as  
 15 determined by Dunnett's test. Values are mean ( $n=4$ )  $\pm$  SE. Growth conditions are as follows: salinity and heat (S&H), drought and  
 16 heat (D&H), salinity and drought (S&D), salinity, drought and heat (S&D&H).

17

18

## 1 ***Starch content depleted under heat-related stress combinations***

2 Under abiotic stresses, such as salinity, drought and heat, starch is usually degraded to support  
3 the plant energy demands and carbon supply at times when photosynthesis is limited (Thalman  
4 and Santelia, 2017). This process resulted in the accumulation of maltose, a major degrading  
5 product of starch, and of its deriving sugars (Thalman et al., 2016). Under all heat stress  
6 combinations, plants accumulated less starch in their leaves, compared with control conditions  
7 (ranging between 65% and 97%; Fig. 3 and Supplementary Fig. S3A). The pattern of starch  
8 attenuation, correlated with expression pattern of starch synthesis and degradation DEGs  
9 (Supplementary Table S2 and Fig. S3B), suggesting a tight regulation, of both anabolic and  
10 catabolic processes, under the combined stresses. In addition, starch was in a close association  
11 with maltose content ( $r=1$ ,  $P=0.004$ ; Supplementary Fig. S3C). Starch content in the leaves did  
12 not correlate with photosynthesis rate ( $r=0.62$ ,  $P=0.3$ ; Supplementary Fig. S3D) or with grain  
13 weight ( $r=0.54$ ,  $P=0.3$ , Supplementary Fig. S3E). The plasticity of starch attenuation under the  
14 different stress combinations demonstrates that it cannot be merely considered as a storage  
15 compound (Thalman and Santelia, 2017) and may imply its involvement in distinct shifts  
16 between defense, maintenance and reproductive processes.

17

## 18 ***Plant energy balance is severely impaired under S&D and S&D&H***

19 Starch degradation and remobilization under stress releases sugars and other derived metabolites,  
20 which can support plant growth, function as compatible solutes and provide an alternative source  
21 of energy and carbon (Krasensky and Jonak, 2012). To improve our understanding on cellular  
22 energy metabolism under stress, we performed a complete foliar metabolic profiling, in parallel  
23 with the transcriptional analysis. Among the 70 annotated metabolites, differentially accumulated  
24 under at least one stress combination, most metabolites (94%) showed the same response pattern  
25 (i.e. accumulation or depletion), across the four combinations. However, the intensity of the  
26 response varied among the different combinations (e.g. GABA, tryptophan and mannose reached  
27 FC differences of 71, 48, and 22, respectively, compared with control conditions; Supplementary  
28 Table S3). Functional classification of the metabolic data revealed that sugars, sugar phosphates  
29 and sugar alcohols constituted up to 41% of the metabolites and enrichment analysis further  
30 identified galactose metabolism as a prevalent pathway under stress. This pathway includes  
31 sugars with various functions such as signaling (e.g. glucose and fructose), transport (sucrose and

1 raffinose), osmoprotectants (e.g. galactinol and myo-inositol), cell wall polysaccharides (e.g.  
 2 galactose and mannose) and glycerolipid metabolism (e.g. galactosylglycerol), which showed  
 3 distinct metabolic responses under each stress combination (Supplementary Fig. S4).  
 4

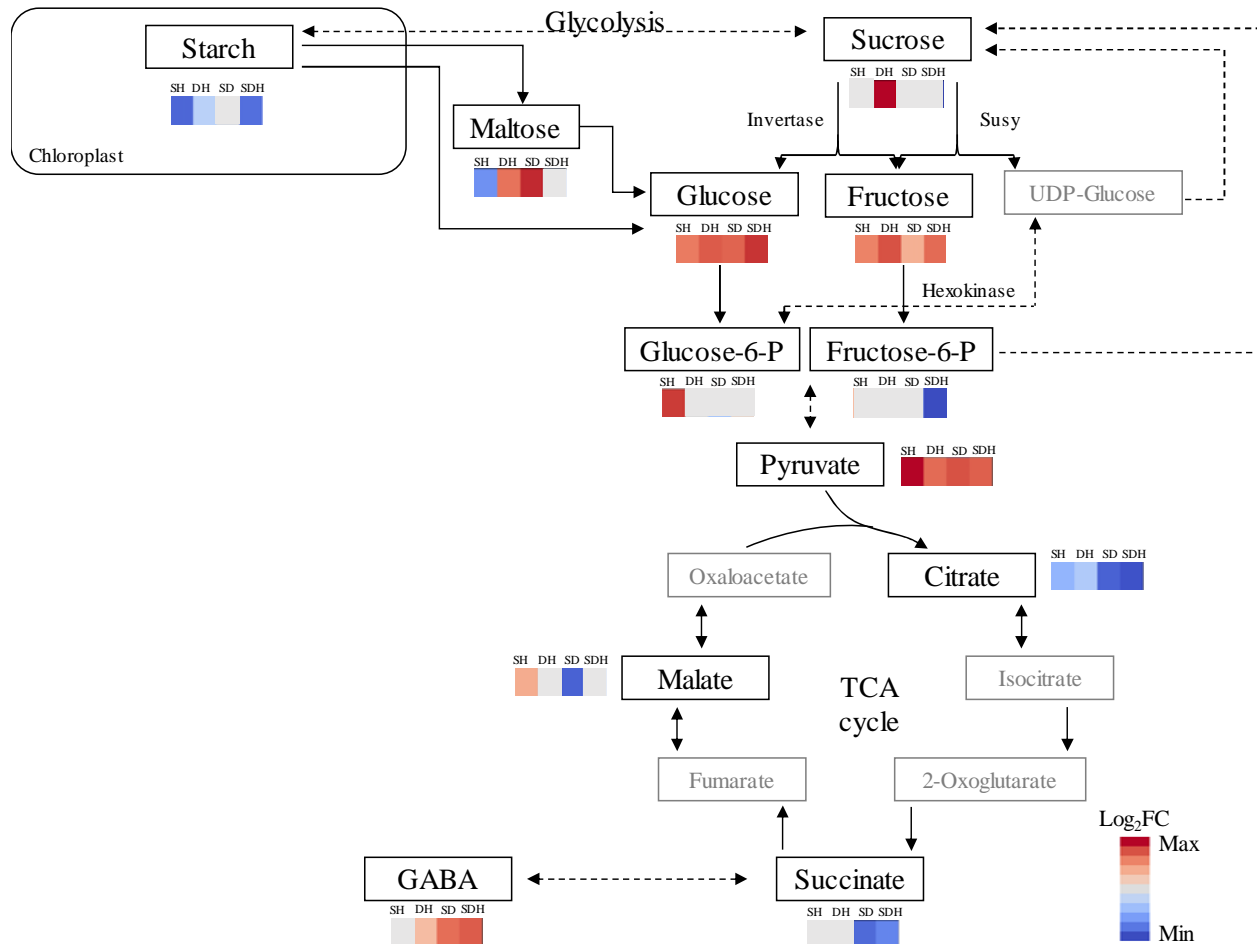

5  
 6 **Fig. 3.** Accumulation patterns of metabolites involved in energy metabolism in *Brachypodium distachyon* plants grown under  
 7 control and combinations of stresses: salinity and heat (S&H), drought and heat (D&H), salinity and drought (S&D), salinity,  
 8 drought and heat (S&D&H). Red and blue colors indicate significant ( $P \leq 0.1$ ) accumulation and depletion of metabolite content,  
 9 respectively, and white color indicates a non-significant change, compared with control.

10

11 We further focused our analysis on metabolites that are involved in cellular respiration.  
 12 Sucrose and its two hexoses constitute the early steps of glycolysis, the first stage of respiration.  
 13 Plants accumulated sucrose only under D&H (FC=1.2). While its breakdown products, the  
 14 hexoses fructose and glucose, accumulated under all combined stresses (Fig. 3 and  
 15 Supplementary Table S3). The hexoses are further converted to glucose-6-P that accumulated  
 16 under S&H (FC=2.2) and fructose-6-P, which depleted under S&D&H (FC=-4.6). The end

1 products of glycolysis include the organic acid pyruvate that accumulated to comparable levels  
2 under all stress combinations and malate, which accumulated under S&H and decreased under  
3 S&D (FC=1.8 and -3.4, respectively). Additional organic acids of the tricarboxylic acid (TCA)  
4 cycle, showed reduced levels under the combined stresses. For example, succinate, a metabolite  
5 connecting the TCA cycle and  $\gamma$ -Aminobutyric acid (GABA) shunt (Fait et al., 2007), showed  
6 decreased levels only under S&D and S&D&H. Consistently, high levels of GABA were detected  
7 in leaves of plants subjected to these two stresses (Fig. 3 and Supplementary Table S4).

8

### 9 ***Preferable accumulation of osmolytes under combined stresses***

10 Accumulation of compatible solutes is an adaptive mechanism that mitigates the deleterious  
11 effects of an osmotic stress by sustaining cellular turgor and water status and protecting cellular  
12 constituents (Rontein et al., 2002). Under all combined stresses, an increase in osmotic  
13 adjustment (OA) was detected, predominantly under S&D and S&D&H. However, this increment  
14 was not sufficient to retain leaf relative water content (RWC), to a level comparable to control  
15 conditions. Heat stress did not contribute to the OA, as indicated by the similar values of OA  
16 under S&D and S&D&H, but it led to a dramatic loss of 20% of RWC under S&D&H compared  
17 with S&D (Fig. 4A).

18 To gain a comprehensive understanding of the relationship between osmolytes (organic  
19 and inorganic) and OA and their effect on RWC, we performed a principle component analysis  
20 (PCA) that included 11 metabolites, three ions and the two physiological measurements. The  
21 cumulative contribution of the two major principal components (PCs, Eigenvalues >1), to the  
22 total variation, was 91%. PC1 that explained 68.2% of the variation was loaded positively with  
23 OA, the metabolites proline, GABA, galactose and glucose, and the ions Na<sup>+</sup>, K<sup>+</sup> and Cl<sup>-</sup>,  
24 suggesting the involvement of these osmolytes in osmoregulation. On the other hand, PC1 was  
25 loaded negatively with RWC, raffinose, galactinol, sucrose and myo-Inositol, indicating the  
26 negative association between OA and RWC and implying that these metabolites did not  
27 contribute to osmotic adjustment in *B. distachyon* (Fig. 4B). The lack of correlation between OA  
28 and fructose, galactitol and trehalose may result from additional functions these metabolites hold,  
29 such as signaling and transport (Ruan, 2014). Cumulative FC of significant compatible solutes  
30 revealed their gradual accumulation across the combined stresses, ranging between 39, under  
31 S&H, and reaching up to 129 cumulative FC, under S&D&H (Supplementary Table S3). Although



1 S&H and D&H had comparable levels of OA (Fig. 4A), under D&H plants accumulated a higher  
 2 level of compatible solutes compared with S&H (i.e. cumulative FC of 50 *versus* 39,  
 3 respectively).

4 Salt-treated plants accumulated higher levels of Na<sup>+</sup> in their leaves compared with control  
 5 and D&H. Accumulation of K<sup>+</sup>, which was positively correlated with both Na<sup>+</sup> and Cl<sup>-</sup>  
 6 accumulation, was detected under all combined stresses, especially in plants subjected to S&D&H  
 7 that accumulated 45% more K<sup>+</sup>, compared with control (Fig. 4C). The accumulation patterns of  
 8 K<sup>+</sup> and Na<sup>+</sup> across the combined stresses resulted in a similar four-fold reduction in K<sup>+</sup> / Na<sup>+</sup>  
 9 ratio among the salt-treated plants (Supplementary Fig. S5A). In addition, Cl<sup>-</sup> was accumulated  
 10 under all combined stresses, primarily in plants subjected to S&D&H, which accumulated twice  
 11 the amount of Cl<sup>-</sup>, compared with control conditions (Supplementary Fig. S5B).

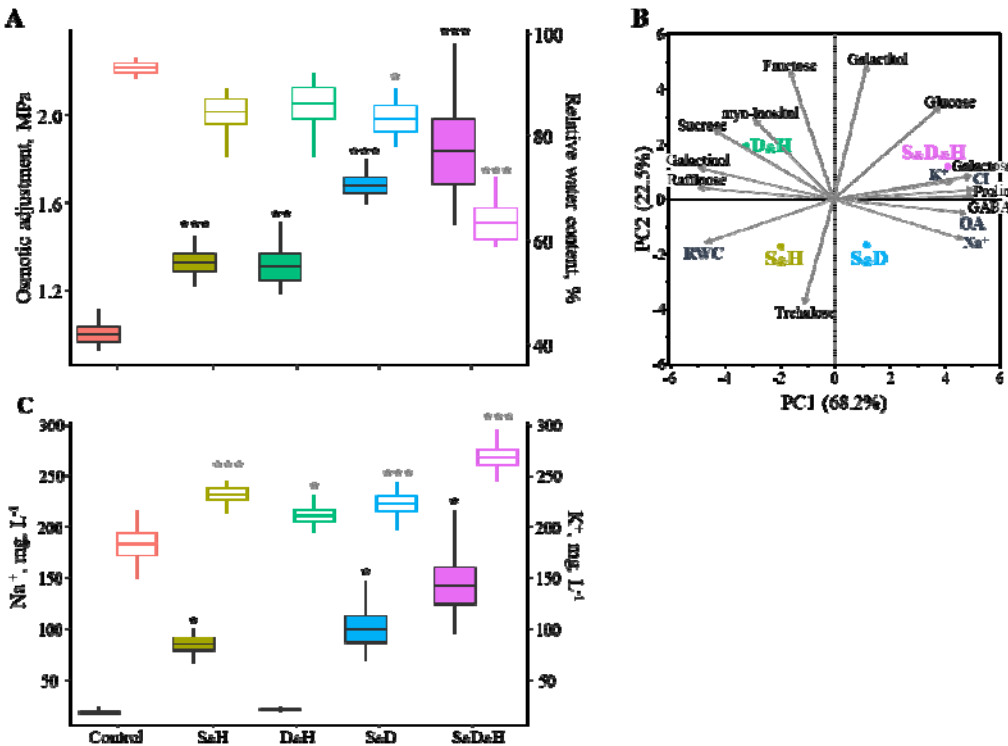

12  
 13 **Fig. 4.** The contribution of osmolytes to osmotic adjustment (OA) and its relationship with relative water content  
 14 (RWC). (A) Box plot of OA and leaf RWC, denoted by filled and empty boxes, respectively. (B) Biplot of a  
 15 principal component (PC) analysis of the relationship among osmolytes (i.e. 11 organic osmolytes, detected by  
 16 metabolic profiling, and three inorganic osmolytes) and the physiological traits OA and RWC, under combinations of  
 17 stresses. (C) Box plot of Na<sup>+</sup> and K<sup>+</sup> concentrations, denoted by filled and empty boxes, respectively. \*, \*\* and \*\*\*  
 18 indicate significant differences between control and stress treatments at  $P < 0.05$ , 0.01 and 0.001, respectively, as  
 19 determined by Dunnett's test. Values are mean ( $n=6$ )  $\pm$  SE. Growth conditions are as follows: salinity and heat (S&H),  
 20 drought and heat (D&H), salinity and drought (S&D), salinity, drought and heat (S&D&H).

21

## 1 **Discussion**

2 Plant acclimations to abiotic stress conditions occur through a coordinated sequence of  
3 transcriptional, translational, metabolic and physiological events, from the cellular to the whole  
4 plant level. These processes change the metabolic status of the plants toward a new steady-state  
5 level that supports plant growth and fitness under the unfavorable conditions. To study  
6 acclimation mechanisms of temperate grasses to combinations of abiotic stresses, we subjected  
7 *B. distachyon* plants to combinations of salinity, drought and heat stresses, which are the major  
8 environmental constraints at the Mediterranean region (Vautard et al., 2007; Maggio et al., 2011).  
9 We examined the extent of phenotypic and metabolic plasticity and the limitation such  
10 conditions imposed on plant performances and fitness. Our analysis revealed commonalities and  
11 divergences between the life-history strategies plants elicited under each unique stress  
12 combination.

13

### 14 ***Under D&H plants exhibited a life-history strategy of accelerated senescence***

15 The Mediterranean-like environments are usually affected by prolonged water stress combined  
16 with heat waves, causing together extensive agricultural losses (Loss and Siddique, 1994). Under  
17 such conditions, annual plants that have a rapid life cycle and escape the spring heat waves may  
18 gain a high fitness. The *B. distachyon* accession Bd21-3 that was collected in northern Iraq is  
19 native to an area with low winter precipitation and high summer temperatures (Des Marais and  
20 Juenger, 2016). Accordingly, these plants exhibited an accelerated senescence under D&H that  
21 was manifested by a significant reduction in chlorophyll content, starting as early as 4 DAA (Fig.  
22 1B), a reduction in photosynthesis rate (Shaar-Moshe et al., 2017), accumulation of  
23 galactosylglycerol, consistent with breakdown of thylakoid membranes, which contain up to  
24 80% galactosylglycerolipids (Holzl and Dormann, 2007), and accumulation of transport sugars  
25 (e.g. sucrose and galactitol) (Fig. 4 and Supplementary Fig. S4 and Table S3). Leaf senescence,  
26 which is characterized by the transition from nutrient assimilation to nutrient remobilization,  
27 involves, in its early phase, breakdown of chloroplasts and decrease in photosynthesis (Avila-  
28 Ospina et al., 2014). The positive correlation between leaf senescence (measured by PSRI) and  
29 expression pattern of genes that are involved in chloroplast nucleoid metabolism and  
30 maintenance provides a transcriptional support for the link between leaf aging and chloroplast  
31 stability. The associations between physiological traits and their underlying gene expression

1 patterns suggest a coordinated regulation between the transcriptional and physiological level and  
2 may facilitate detection of pathways and genes that directly control plant acclimations to stress  
3 conditions.

4 Despite a reduction in photosynthesis under D&H, the hexoses, glucose and fructose  
5 accumulated under D&H (Fig. 3 and Supplementary Table S3). This may occur through starch  
6 remobilization, which provides an alternative source of energy and carbon, or through a decrease  
7 in amino acid synthesis, which leads to a higher carbon availability (Jongebloed et al., 2004).  
8 Indeed, under D&H, starch level depleted, compared with control conditions, and the amino acids  
9 tryptophan and GABA, only mildly accumulated, compared with plants grown under the other  
10 stress combinations (Supplementary Table S3). In addition, considering that up to 70% of the  
11 leaf proteins are localized within the chloroplasts, the recycling and management of materials  
12 accumulated during leaf development into exportable nutrients, is a critical process in senescing  
13 plants to sustain yield and fitness (Sade et al., 2018). The accumulation of transport sugars that  
14 can move through the phloem to the filling grains may indicate that nutrient remobilization was  
15 accelerated under D&H. Yet, nutrient reservoir and/ or their transport rate did not meet the  
16 progression of senescence, resulting in a reduction of 19% in reproductive allocation and a  
17 decreased in total grain weight (Fig. 1D-E). This life-history strategy of accelerated senescence  
18 resulted in a trade-off in the reproductive allocation via shortened grain-filling period, which  
19 consequently diminished grain yield.

20

### 21 *Plants grown under S&H exhibited moderate effects of the stress on functional and* 22 *performance traits*

23 Plants subjected to S&H were able to sustain, for a longer period, higher or comparable values of  
24 chlorophyll content and  $Fv/Fm$ , respectively (Figs. 1B, 2A), which further support the moderate  
25 decreases in photosynthesis rate, compared with control (Shaar-Moshe et al., 2017). Under S&H  
26 plants accumulated 29% less shoot DW, similarly to D&H, yet the reproductive allocation was  
27 comparable to control conditions, indicating that the plants maintained source-sink relationships  
28 and successfully partitioned photosynthetic assimilates to the reproductive tissues (Fig. 1C, D).  
29 Plants grown under S&H also maintained leaf water content at a level comparable to control  
30 conditions, possibly through an increase in OA (Fig. 4A). By increasing the intercellular  
31 osmolarity plants maintain a high cellular turgor that is necessary for cell expansion and facilitate

1 a higher stomatal conductance under lower water potentials, thus actively modifying the  
2 environment they experience.

3 Osmotic adjustment can be achieved through *de-novo* synthesis of compatible solutes that  
4 are accumulated mainly in the cytosol and through accumulation of inorganic ions, which  
5 accumulate in the vacuole where larger changes in ionic strength can be tolerated. Compatible  
6 solutes, which are defined as small water-soluble molecules devoid of metabolic effects, can also  
7 function in osmoprotection of cellular structures, by interacting with membranes, protein  
8 complexes, or enzymes (Bohnert et al., 1995). OA, which occurred under all stress  
9 combinations, has increased with the aggravation of the stresses (Fig. 4A) and is proportional to  
10 the reduction in plant water status (Blum, 2017). In accordance, accumulation of compatible  
11 solutes such as glucose, proline and GABA, was positively correlated with OA, and exhibited a  
12 higher accumulation under S&D and S&D&H, and a lower accumulation under S&H and D&H  
13 (Fig. 4B and Supplementary Table S3). Plants' ability to retain a high water content under S&H,  
14 despite a relative mild increase in organic osmolyte accumulation, may be attributed to an  
15 increase in inorganic osmolytes such as  $K^+$  and especially  $Na^+$  that are non-competitive to  
16 growth (Fig. 5C, and Supplementary Fig. S5). *De novo* synthesis of osmolytes is an energetically  
17 expensive process that may come at a large metabolic cost. Therefore, ion accumulation can be  
18 an energetically more favorable option (providing it is effectively sequestered in the vacuole)  
19 (Fan et al., 2015). Accumulation of inorganic osmolytes may mitigate the energy trade-off  
20 between defense mechanisms and reproductive output and prioritize the latter, thus, minimizing  
21 yield penalty under S&H (Shabala and Shabala, 2011).

## 22 23 ***Plants' energy balance and fitness were severely damaged under combinations of S&D and*** 24 ***S&D&H***

25 Soil salinity is a growing concern in arid and semi-arid regions, both in cultivated land and  
26 natural habitats, leading to severe reductions in plant growth and productivity (Rozema and  
27 Flowers, 2008). Limited water availability can impair Hill reaction, evaporative coolant and  
28 mass flow of solvents, from both the soil and source tissues (Bohnert et al., 1995). Indeed, under  
29 S&D and S&D&H, plants were not able to retain a high RWC as control plants (Fig. 4B), and  
30 photosynthesis and transpiration rates dropped by  $\geq 82$  and 90%, respectively. In accordance,  
31 leaf temperature increased significantly compared with either control or single heat stress (Shaar-

1 Moshe et al., 2017), implying limited ability of the plants to cool their leaves by transpiration.  
2 S&D and S&D&H also led to sever growth attenuations and to a decrease in the reproductive  
3 output by 63 and 74%, respectively (Fig. 1C-G). Similar effects of reduction in plant growth and  
4 productivity, were reported for wild (*Hordeum spontaneum*) and domesticated (*H. vulgare*)  
5 barley subjected to S&D during the vegetative and reproductive stages (Ahmed et al., 2013).

6 Sink strength is of a paramount importance for grain filling. The developing grains are  
7 mainly depended on two sources of assimilates: photosynthesis after anthesis and translocation  
8 of reservoirs assimilated before anthesis and temporarily stored in the stem. Under stress  
9 conditions, which diminish photosynthesis capacity of source tissues, grain filling is largely  
10 dependent on remobilization of stem reserves (Gallagher et al., 1976). The prolonged stress  
11 conditions, imposed under S&D and S&D&H, severely curtailed photosynthesis capacity and  
12 shifted the balance from maintenance and reproduction towards defense processes throughout the  
13 plants' life-history. As a consequence of the decreased photosynthesis and culm length (Shaar-  
14 Moshe et al., 2017), these plants are expected to contain less stem reserves (Borrell et al., 1993)  
15 that are essential for grain filling and source-sink homeostasis (Jagadish et al., 2015).

16 The effect of phenotypic plasticity on plant fitness can be positive, neutral or maladaptive  
17 (van Kleunen and Fischer, 2005). Thus, not all alterations lead to the desired outcome of  
18 ameliorating the unfavorable conditions (Donohue, 2003). The limited water availability, under  
19 S&D and S&D&H, could result in attenuation of shoot DW accumulation (Fig. 1A), which leads  
20 to accumulation of sugars, such as glucose and galactose (Fig. 3 and Supplementary Table S3),  
21 due to a decreased demand (Hummel et al., 2010). Sugar accumulation can also result in  
22 feedback inhibition of photosynthesis (Rossi et al., 2015). Depletions of primary metabolites of  
23 the TCA cycle, such as citrate and succinate under S&D&H, and malate under S&D, further  
24 suggest that cellular respiration, were compromised under these combinations. GABA, which has  
25 been shown to accumulate under abiotic and biotic stresses and is associated with diverse  
26 physiological responses, including fluxes of carbon into the TCA cycle, nitrogen metabolism and  
27 osmoregulation (Bouche and Fromm, 2004), was largely produced under S&D and S&D&H (Fig.  
28 3 and Supplementary Table S3). Since GABA shunt is closely connected to the TCA cycle (Fait  
29 et al., 2007), the surplus accumulation of GABA, under S&D and S&D&H, may result from a  
30 decline in respiration. Primary metabolism can also be modified due to increased activation of  
31 secondary metabolism under different environmental constrains (Kooke and Keurentjes, 2011).

1           Altogether, the morph-physiological traits and metabolic profiling demonstrate the  
2 aggravating effects of the combined stresses, which hamper plant performances, diminish their  
3 fitness and may impend their dispersion in areas prone to simultaneous occurrence of salinity and  
4 drought with or without heat stress.

5

### 6 ***Conclusions and future perspective***

7 The prevalence of different combinations of stresses in the field, and their projected increase in  
8 frequency and intensity (Suzuki et al., 2014; Zandalinas et al., 2018), challenges the common  
9 methodology of single stress treatments and the relevance of such assays to plant acclimation  
10 under natural and agricultural systems. The variable and unpredictable environmental conditions  
11 that are associated with climate change, force plants to rapidly acclimate, both within and across  
12 generations (Nicotra et al., 2010). Understanding the effects of environmental constraints on  
13 plant life-history strategies and the limits of plasticity under changing environments can assist in  
14 predicting species dispersion and facilitate the development of varieties, which are better adapted  
15 to the foreseen climatic conditions. To meet these challenges, a multidisciplinary approach that  
16 considers physiological and phenological information of realistic stress assays, together with  
17 system regulatory mechanisms, from the gene to the whole plant level, should be undertaken.

18

19

### 20 **Supplementary material**

21 Supplementary data are available at JXB online.

22 **Table S1.** Statistical analysis of physiological traits at three developmental stages.

23 **Table S2.** List of differentially expressed genes that were used for correlation analyses.

24 **Table S3.** List of fold change and false discovery rate values of putative metabolites.

25 **Fig. S1.** A schematic overview of the stress combination assay.

26 **Fig. S2.** Germination rates of seeds from plants subjected stress combinations.

27 **Fig. S3.** Association between leaf starch content and physiological traits or gene expression  
28 pattern.

29 **Fig. S4.** Galactose metabolic pathway under combinations of stresses.

30 **Fig. S5.** Ion concentration in *Brachypodium distachyon* leaves under combinations of  
31 stresses.

## 1 **Acknowledgments**

2 We would like to thank A. Oksenberg, I. Vilan, I. Ayalon and I. Sabag for their technical  
3 assistance with the physiological experiments and N. Jayasinghe for analysis of metabolic  
4 samples. GC-MS analysis was carried out at Metabolomics Australia, School of BioSciences,  
5 University of Melbourne, which is supported by funds from the Australian Government's  
6 National Collaborative Research Infrastructure Scheme (NCRIS) administered through  
7 Bioplatforms Australia (BPA) Ltd. This research partially supported by the United States-Israel  
8 Binational Science Foundation (BSF) (grant #2011310) and the Hebrew University of Jerusalem.  
9 LSM is indebted to the Israeli President's Scholarship for Scientific Excellence and Innovation.

10

## 11 **Author contributions**

12 L.S.-M. and R.H. performed the experiments, L.S.-M. analyzed the experiments, L.S.-M., U.R.,  
13 and Z.P. designed the experiments, L.S.-M., and Z.P. wrote the manuscript with edits from all  
14 the authors

15

16

## 17 **References**

- 18 **Ahmed IM, Cao F, Zhang M, Chen X, Zhang G, Wu F.** 2013. Difference in yield and  
19 physiological features in response to drought and salinity combined stress during anthesis in  
20 Tibetan wild and cultivated barleys. *PLoS One* **8**,  
21 <https://doi.org/10.1371/journal.pone.0077869>.
- 22 **Avila-Ospina L, Moison M, Yoshimoto K, Masclaux-Daubresse C.** 2014. Autophagy, plant  
23 senescence, and nutrient recycling. *Journal of Experimental Botany* **65**, 3799-3811.
- 24 **Barhoumi Z, Atia A, Rabhi M, Djebali W, Abdelly C, Smaoui A.** 2010. Nitrogen and NaCl  
25 salinity effects on the growth and nutrient acquisition of the grasses *Aeluropus littoralis*,  
26 *Catapodium rigidum*, and *Brachypodium distachyum*. *Journal of Plant Nutrition and Soil*  
27 *Science* **173**, 149-157.
- 28 **Barry CS.** 2009. The stay-green revolution: recent progress in deciphering the mechanisms of  
29 chlorophyll degradation in higher plants. *Plant Science* **176**, 325-333.
- 30 **Bazzaz FA, Chiariello NR, Coley PD, Pitelka LF.** 1987. Allocating resources to reproduction  
31 and defense. *Bioscience* **37**, 58-67.

- 1 **Benjamini Y, Hochberg Y.** 1995. Controlling the false discovery rate: A practical and powerful  
2 approach to multiple testing. *Journal of the Royal Statistical Society. Series B*  
3 *(Methodological)* **57**, 289-300.
- 4 **Blum A.** 2017. Osmotic adjustment is a prime drought stress adaptive engine in support of plant  
5 production. *Plant, Cell and Environment* **40**, 4-10.
- 6 **Bohnert HJ, Nelson DE, Jensen RG.** 1995. Adaptations to environmental stresses. *Plant Cell* **7**,  
7 1099-1111.
- 8 **Borrell AK, Incoll LD, Dalling MJ.** 1993. The influence of the *Rht1* and *Rht2* alleles on the  
9 deposition and use of stem reserves in wheat. *Annals of Botany* **71**, 317-326.
- 10 **Bouche N, Fromm H.** 2004. GABA in plants: Just a metabolite? *Trends in Plant Science* **9**, 110-  
11 115.
- 12 **Bradshaw AD.** 1965. Evolutionary significance of phenotypic plasticity in plants. *Advances in*  
13 *Genetics* **13**, 115-155.
- 14 **De Deyn GB.** 2017. Plant life history and above-belowground interactions: missing links. *Oikos*  
15 **126**, 497-507.
- 16 **Des Marais DL, Juenger TE.** 2016. *Brachypodium* and the abiotic environment. In: Vogel J, ed.  
17 Genetics and Genomics of *Brachypodium*. Switzerland: Springer, 291-311.
- 18 **Des Marais DL, Lasky JR, Verslues PE, Chang TZ, Juenger TE.** 2017. Interactive effects of  
19 water limitation and elevated temperature on the physiology, development and fitness of  
20 diverse accessions of *Brachypodium distachyon*. *New Phytologist* **214**, 132-144.
- 21 **Dias DA, Hill CB, Jayasinghe NS, Atieno J, Sutton T, Roessner U.** 2015. Quantitative  
22 profiling of polar primary metabolites of two chickpea cultivars with contrasting responses to  
23 salinity. *Journal of Chromatography B* **1000**, 1-13.
- 24 **Donohue K.** 2003. Setting the stage: phenotypic plasticity as habitat selection. *International*  
25 *Journal of Plant Sciences* **164**, S79-S92.
- 26 **Fait A, Fromm H, Walter D, Galili G, Fernie AR.** 2007. Highway or byway: the metabolic  
27 role of the GABA shunt in plants. *Trends in Plant Science* **13**, 14-19.
- 28 **Fan Y, Shabala S, Ma Y, Xu R, Zhou M.** 2015. Using QTL mapping to investigate the  
29 relationships between abiotic stress tolerance (drought and salinity) and agronomic and  
30 physiological traits. *BMC Genomics* **16**, 43.



- 1 **Gallagher JN, Biscoe PV, Hunter B.** 1976. Effects of drought on grain-growth. *Nature* **264**,  
2 541-542.
- 3 **Gitelson AA, Zur Y, Chivkunova OB, Merzlyak MN.** 2002. Assessing carotenoid content in  
4 plant leaves with reflectance spectroscopy. *Photochemistry and Photobiology* **75**, 272-281.
- 5 **Grime JP.** 1977. Evidence for the existence of three primary strategies in plants and its  
6 relevance to ecological and evolutionary theory. *American Naturalist* **111**, 1169-1194.
- 7 **Hill CB, Dias DA, Roessner U.** 2015. Current and emerging applications of metabolomics in the  
8 field of agricultural biotechnology. In: Ravishankar RV, ed. *Advances in Food*  
9 *Biotechnology*. John Wiley & Sons Ltd, 13–26.
- 10 **Hirschberg J.** 2001. Carotenoid biosynthesis in flowering plants. *Current Opinion in Plant*  
11 *Biology* **4**, 210-218.
- 12 **Holz G, Dormann P.** 2007. Structure and function of glycolipids in plants and bacteria.  
13 *Progress in Lipid Research* **46**, 225-243.
- 14 **Hong SY, Park JH, Cho SH, Yang MS, Park CM.** 2011. Phenological growth stages of  
15 *Brachypodium distachyon*: codification and description. *Weed Research* **51**, 612-620.
- 16 **Hummel I, Pantin F, Sulpice R, et al.** 2010. *Arabidopsis* plants acclimate to water deficit at  
17 low cost through changes of carbon usage: an integrated perspective using growth, metabolite,  
18 enzyme, and gene expression analysis. *Plant Physiology* **154**, 357-372.
- 19 **Jagadish KSV, Kishor PBK, Bahuguna RN, von Wiren N, Sreenivasulu N.** 2015. Staying  
20 alive or going to die during terminal senescence-an enigma surrounding yield stability.  
21 *Frontiers in Plant Science* **6**, 1070.
- 22 **Jongebloed U, Szederkenyi J, Hartig K, Schobert C, Komor E.** 2004. Sequence of  
23 morphological and physiological events during natural ageing and senescence of a castor bean  
24 leaf: sieve tube occlusion and carbohydrate back-up precede chlorophyll degradation.  
25 *Physiologia Plantarum* **120**, 338-346.
- 26 **Jump AS, Peñuelas J.** 2005. Running to stand still: adaptation and the response of plants to  
27 rapid climate change. *Ecology Letters* **8**, 1010-1020.
- 28 **Kooke R, Keurentjes JJB.** 2011. Multi-dimensional regulation of metabolic networks shaping  
29 plant development and performance. *Journal of Experimental Botany* **63**, 3353-3365.
- 30 **Krasensky J, Jonak C.** 2012. Drought, salt, and temperature stress-induced metabolic  
31 rearrangements and regulatory networks. *Journal of Experimental Botany* **63**, 1593–1608

- 1 **Levitt J.** 1972. *Responses of Plant to Environmental Stress*. N.Y. Academic Press.
- 2 **Loss SP, Siddique KHM.** 1994. Morphological and physiological traits associated with wheat  
3 yield increases in Mediterranean environments. *Advances in Agronomy* **52**, 229-276.
- 4 **Love MI, Huber W, Anders S.** 2014. Moderated estimation of fold change and dispersion for  
5 RNA-seq data with DESeq2. *Genome Biology* **15**, 550.
- 6 **Lu Y.** 2016. Identification and roles of photosystem II assembly, stability, and repair factors in  
7 *Arabidopsis*. *Frontiers in Plant Science* **7**,168.
- 8 **Maggio A, De Pascale S, Fagnano M, Barbieri G.** 2011. Saline agriculture in Mediterranean  
9 environments. *Italian Journal of Agronomy* **6**, 36-43.
- 10 **Matesanz S, Gianoli E, Valladares F.** 2010. Global change and the evolution of phenotypic  
11 plasticity in plants. *Annals of the New York Academy of Sciences* **1206**, 35-55.
- 12 **Merzlyak MN, Gitelson AA, Chivkunova OB, Rakitin VY.** 1999. Non-destructive optical  
13 detection of pigment changes during leaf senescence and fruit ripening. *Physiologia*  
14 *Plantarum* **106**, 135-141.
- 15 **Mickelbart MV, Hasegawa PM, Bailey-Serres J.** 2015. Genetic mechanisms of abiotic stress  
16 tolerance that translate to crop yield stability. *Nature Reviews Genetics* **16**, 237-251.
- 17 **Naschitz S, Naor A, Genish S, Wolf S, Goldschmidt EE.** 2010. Internal management of non-  
18 structural carbohydrate resources in apple leaves and branch wood under a broad range of  
19 sink and source manipulations. *Tree Physiology* **30**, 715-727.
- 20 **Nicotra AB, Atkin OK, Bonser SP, Davidson AM, Finnegan EJ, Mathesius U, van Kleunen**  
21 **M.** 2010. Plant phenotypic plasticity in a changing climate. *Trends in Plant Science* **15**, 684-  
22 692.
- 23 **Nilson SE, Assmann SM.** 2010. Heterotrimeric G proteins regulate reproductive trait plasticity  
24 in response to water availability. *New Phytologist* **185**, 734-746.
- 25 **Nisar N, Li L, Lu S, Khin NC, Pogson BJ.** 2015. Carotenoid metabolism in plants. *Molecular*  
26 *Plant* **8**, 68-82.
- 27 **Pigliucci M.** 2001. *Phenotypic Plasticity: Beyond Nature and Nurture*. Baltimore, MD: The  
28 Johns Hopkins University Press.
- 29 **Rontein D, Basset G, Hanson AD.** 2002. Metabolic engineering of osmoprotectant  
30 accumulation in plants. *Metabolic Engineering* **4**, 49-56.

- 1 **Rossi M, Bermudez L, Carrari F.** 2015. Crop yield: challenges from a metabolic perspective.  
2 *Current Opinion in Plant Biology* **25**, 79-89.
- 3 **Rozema J, Flowers T.** 2008. Crops for a salinized world. *Science* **322**, 1478-1480.
- 4 **Ruan YL.** 2014. Sucrose metabolism: gateway to diverse carbon use and sugar signaling.  
5 *Annual Review of Plant Biology* **65**, 33-67.
- 6 **Sade N, Del Mar Rubio-Wilhelmi M, Umnajkitikorn K, Blumwald E.** 2018. Stress-induced  
7 senescence and plant tolerance to abiotic stress. *Journal of Experimental Botany* **69**, 845–853.
- 8 **Salguero-Gomez R, Jones OR, Jongejans E, Blomberg SP, Hodgson DJ, Mbeau-Ache C,**  
9 **Zuidema PA, de Kroon H, Buckley YM.** 2016. Fast-slow continuum and reproductive  
10 strategies structure plant life-history variation worldwide. *Proceedings of the National*  
11 *Academy of Sciences, USA* **113**, 230-235.
- 12 **Schlichting CD, Smith H.** 2002. Phenotypic plasticity: Linking molecular mechanisms with  
13 evolutionary outcomes. *Evolutionary Ecology* **16**, 189-211.
- 14 **Scholthof KBG, Irigoyen S, Catalan P, Mandadi K.** 2018. *Brachypodium*: A monocot grass  
15 model system for plant biology. *Plant Cell*, **30**, 1673-1694.
- 16 **Shaar-Moshe L, Blumwald E, Peleg Z.** 2017. Unique physiological and transcriptional shifts  
17 under combinations of salinity, drought, and heat. *Plant Physiology* **174**, 421-434.
- 18 **Shaar-Moshe L, Hubner S, Peleg Z.** 2015. Identification of conserved drought-adaptive genes  
19 using a cross-species meta-analysis approach. *BMC Plant Biology* **15**, 111.
- 20 **Shabala S, Shabala L.** 2011. Ion transport and osmotic adjustment in plants and bacteria.  
21 *Biomolecular Concepts* **2**, 407-419.
- 22 **Sultan SE.** 2000. Phenotypic plasticity for plant development, function and life history. *Trends*  
23 *in Plant Sciences* **5**, 537-542.
- 24 **Suzuki N, Rivero RM, Shulaev V, Blumwald E, Mittler R.** 2014. Abiotic and biotic stress  
25 combinations. *New Phytologist* **203**, 32-43.
- 26 **Thalmann M, Pazmino D, Seung D, Horrer D, Nigro A, Meier T, Kölling K, Pfeifhofer**  
27 **HW, Zeeman SC, Santelia D.** 2016. Regulation of leaf starch degradation by abscisic acid is  
28 important for osmotic stress tolerance in plants. *Plant Cell* **28**, 1860-1878.
- 29 **Thalmann M, Santelia D.** 2017. Starch as a determinant of plant fitness under abiotic stress.  
30 *New Phytologist* **214**, 943-951.

- 1 **Thimm O, Blasing O, Gibon Y, Nagel A, Meyer S, Kruger P, Selbig J, Muller LA, Rhee SY,**  
2 **Stitt M.** 2004. MAPMAN: A user-driven tool to display genomics data sets onto diagrams of  
3 metabolic pathways and other biological processes. *Plant Journal* **37**, 914-939.
- 4 **van Kleunen M, Fischer M.** 2005. Constraints on the evolution of adaptive phenotypic  
5 plasticity in plants. *New Phytologist* **166**, 49-60.
- 6 **Vautard R, Yiou P, D'Andrea F, de Noblet N, Viovy N, Cassou C, Polcher J, Ciais P,**  
7 **Kageyama M, Fan Y.** 2007. Summertime European heat and drought waves induced by  
8 wintertime Mediterranean rainfall deficit. *Geophysical Research Letters* **34**, L07711
- 9 **Violle C, Navas ML, Vile D, Kazakou E, Fortunel C. Hummel I, Garnier E.** 2007. Let the  
10 concept of trait be functional! *Oikos* **116**, 882-892.
- 11 **Watt M, Moosavi S, Cunningham SC, Kirkegaard JA, Rebetzke GJ, Richards RA.** 2013. A  
12 rapid, controlled-environment seedling root screen for wheat correlates well with rooting  
13 depths at vegetative, but not reproductive, stages at two field sites. *Annals of Botany* **112**, 447-  
14 455.
- 15 **Whan AP, Smith AB, Cavanagh CR, Ral JP, Shaw LM, Howitt CA, Bischof L.** 2014.  
16 GrainScan: A low cost, fast method for grain size and colour measurements. *Plant Methods*  
17 **10**, 23.
- 18 **Xia J, Wishart DS.** 2016. Using MetaboAnalyst 3.0 for comprehensive metabolomics data  
19 analysis. *Current Protocols in Bioinformatics* **55**, 10-14.
- 20 **Yermiyahu U, Heuer B, Silverman D, Faingold I, Avraham L.** 2017. Nitrate analysis of  
21 *Diploaxis tenuifolia*: Fresh versus dry material for meeting international standards and  
22 regulations. *Israel Journal of Plant Sciences*, **19**, 1-4.
- 23 **Zandalinas SI, Mittler R, Balfagon D, Arbona V, Gomez-Cadenas A.** 2018. Plant adaptations  
24 to the combination of drought and high temperatures. *Physiologia Plantarum* **162**, 2-12.
